# Supplementary material for: Mouse Cytomegalovirus infection overrules T regulatory cell suppression on natural killer cells
Source: PubMed Central journal article supplement (PMC4254395; doi:10.1186/1743-422x-11-145), 2014-08-09

# Supplementary Figure 3

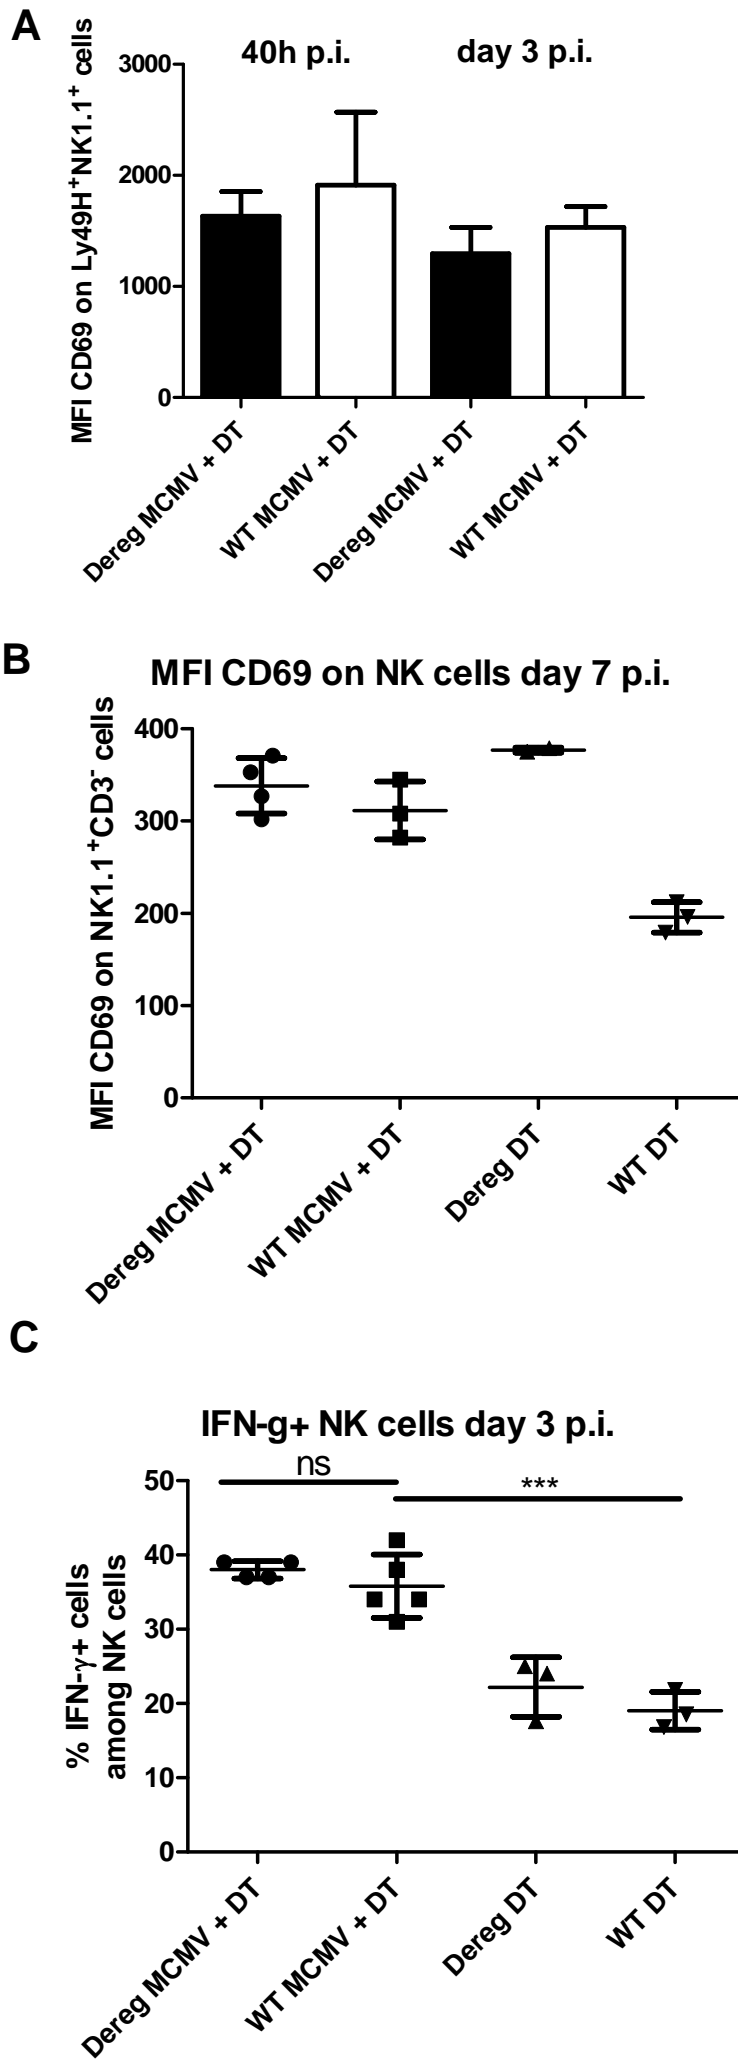

Supplement: 12985_2014_2471_MOESM3_ESM.pdf [file 12985_2014_2471_MOESM3_ESM.pdf]
